# Supplementary material for: Structural modification and dynamicin vitrofermentation profiles of precooked pea starch as affected by different drying methods
Source: Royal Society of Chemistry journal article supplement (doi:10.1039/d1fo02094c), 2021-01-01
Supplement: d1fo02094c1.pdf [file d1fo02094c1.pdf]

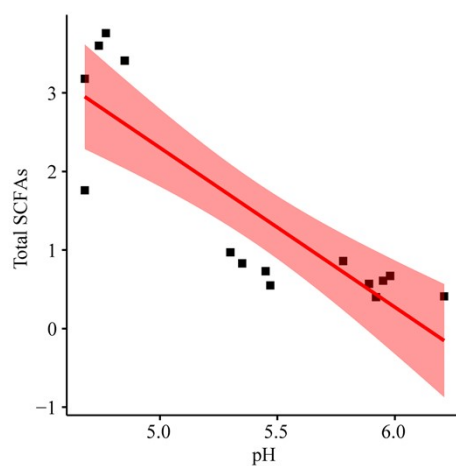

**Fig. S1.** Correlation analysis between total short-chain fatty acids and pH during *in vitro* fermentation for different dried starch samples using Pearson correlation test.
